# Supplementary figures and images for: Green Synthesized Polymeric Iodophors with Thyme as Antimicrobial Agents
Source: MDPI journal article supplement (doi:10.3390/ijms25021133), 2024-01-17

EDS Layered Image 4

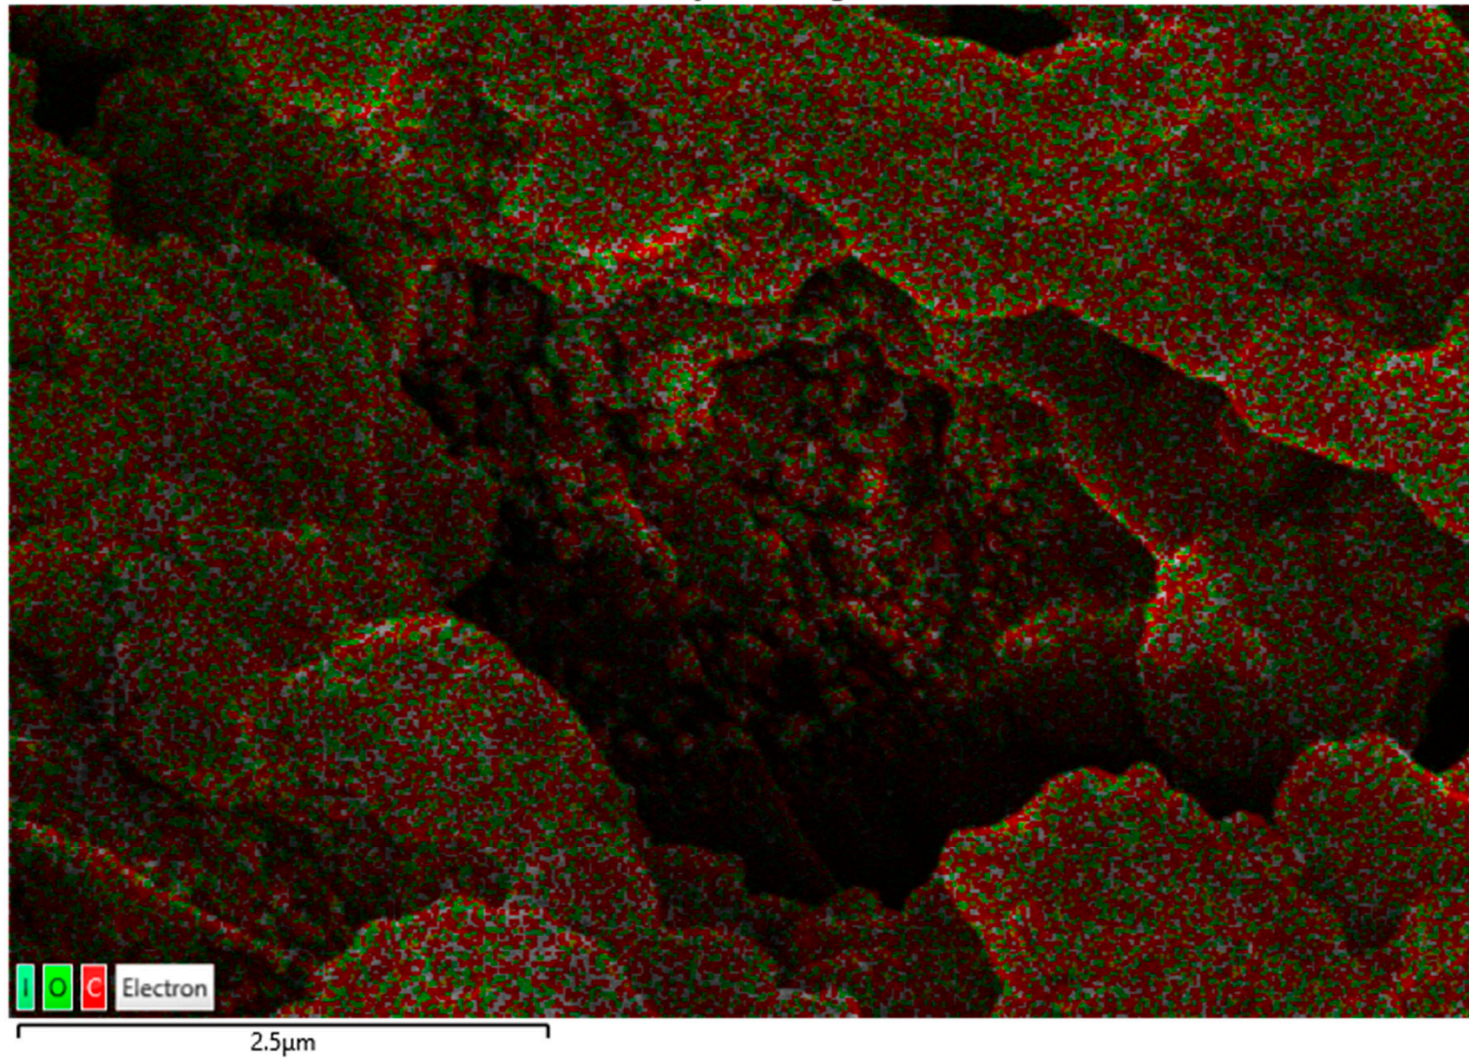

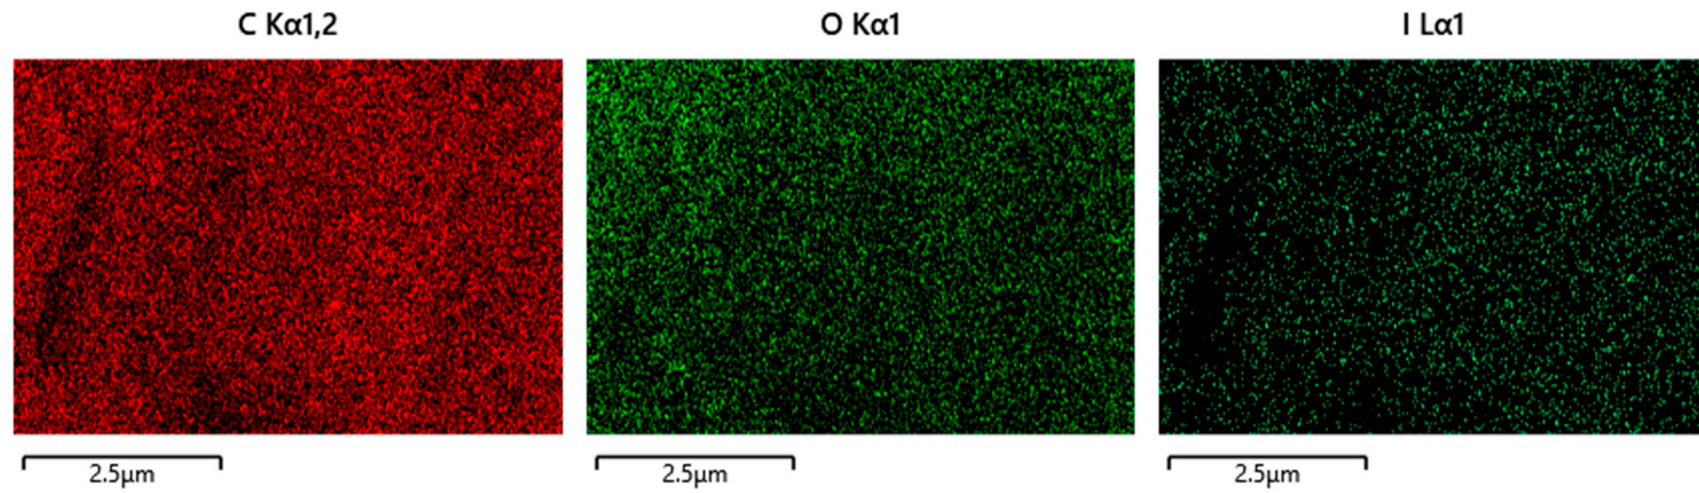

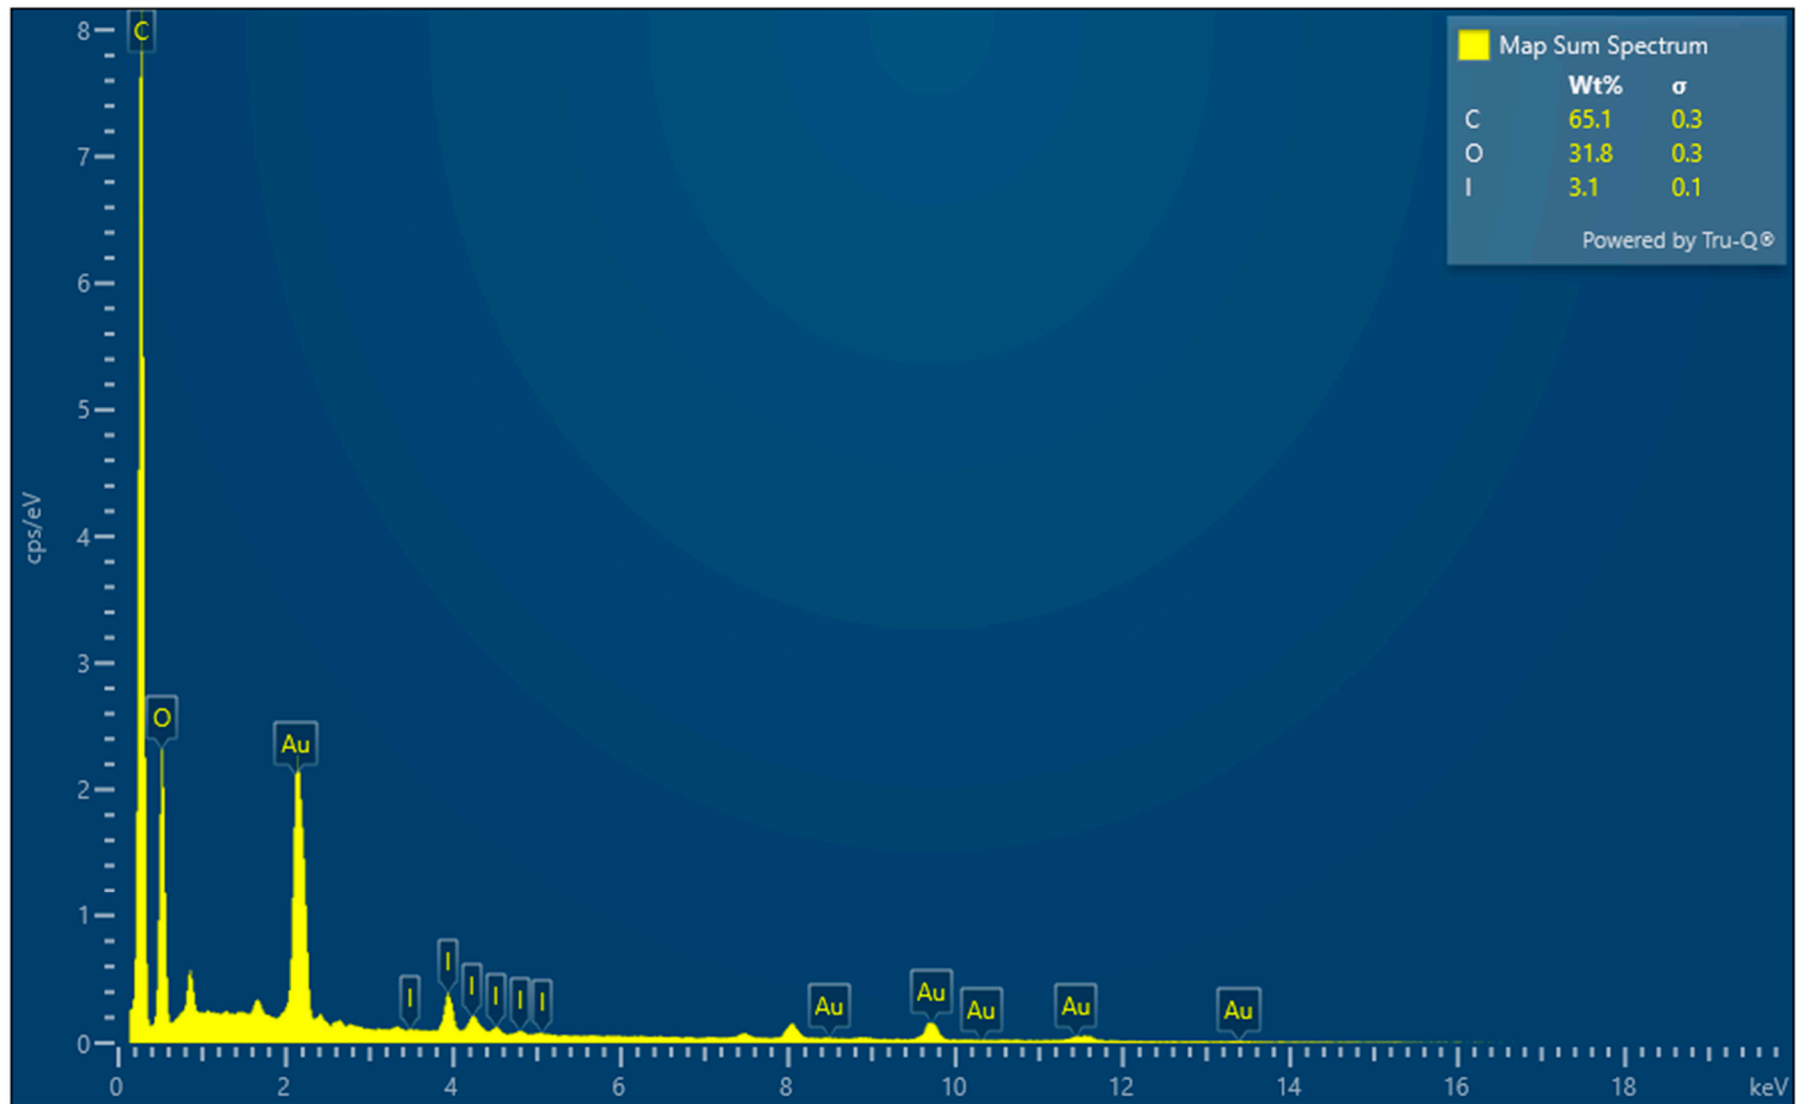

Supplement: s1 [file s1]

EDS Layered Image 11

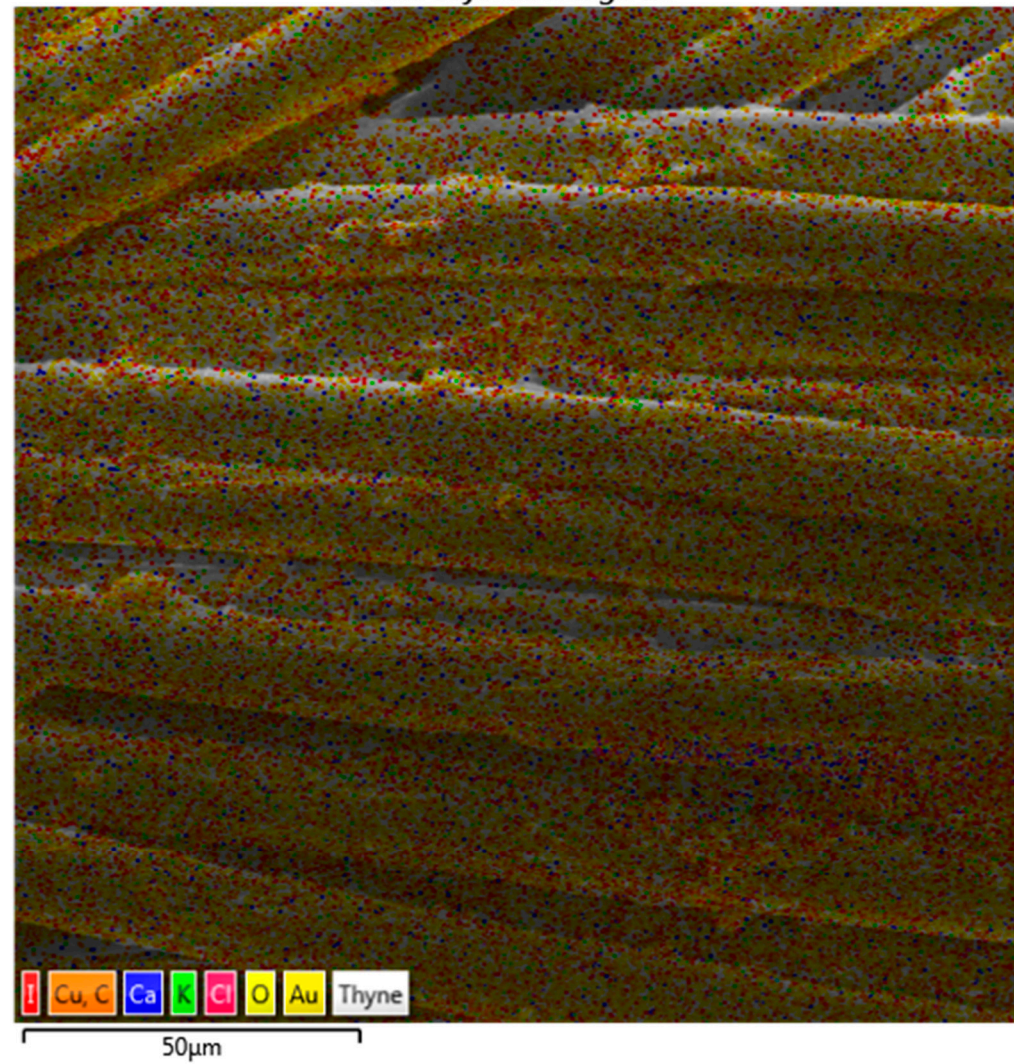

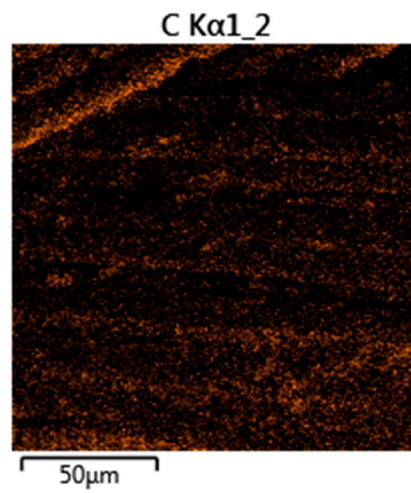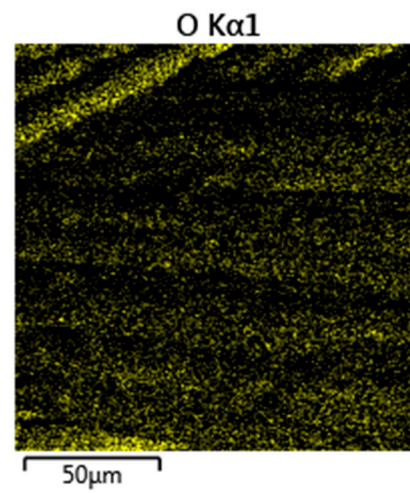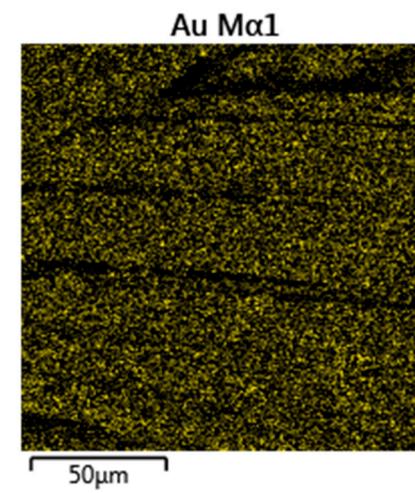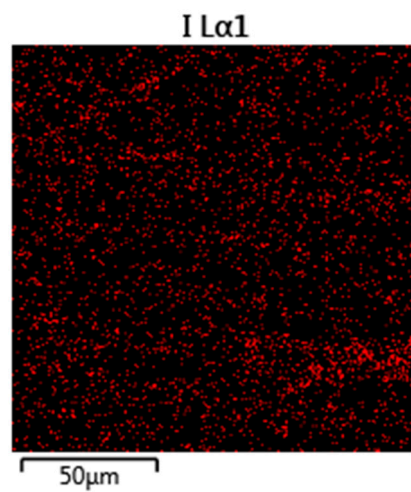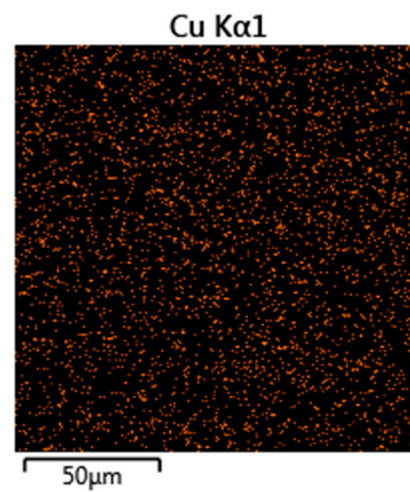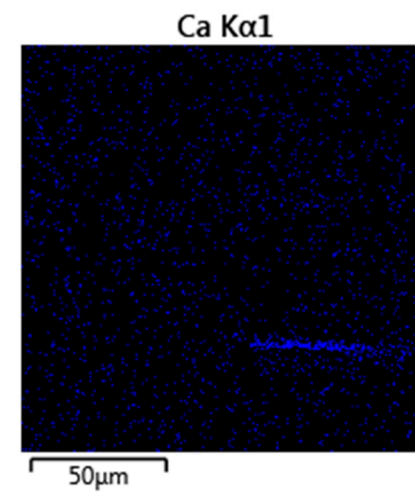

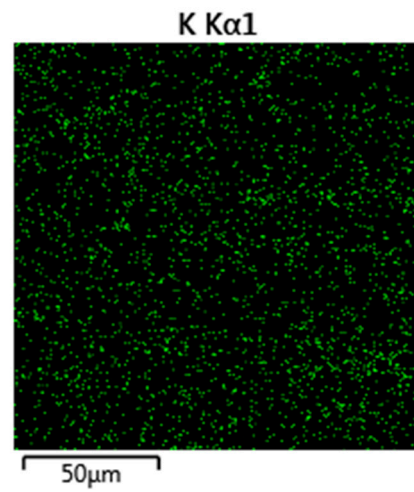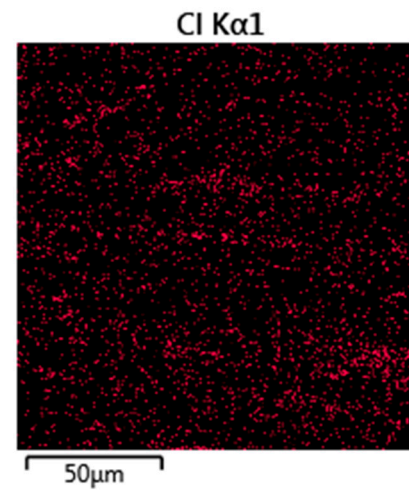

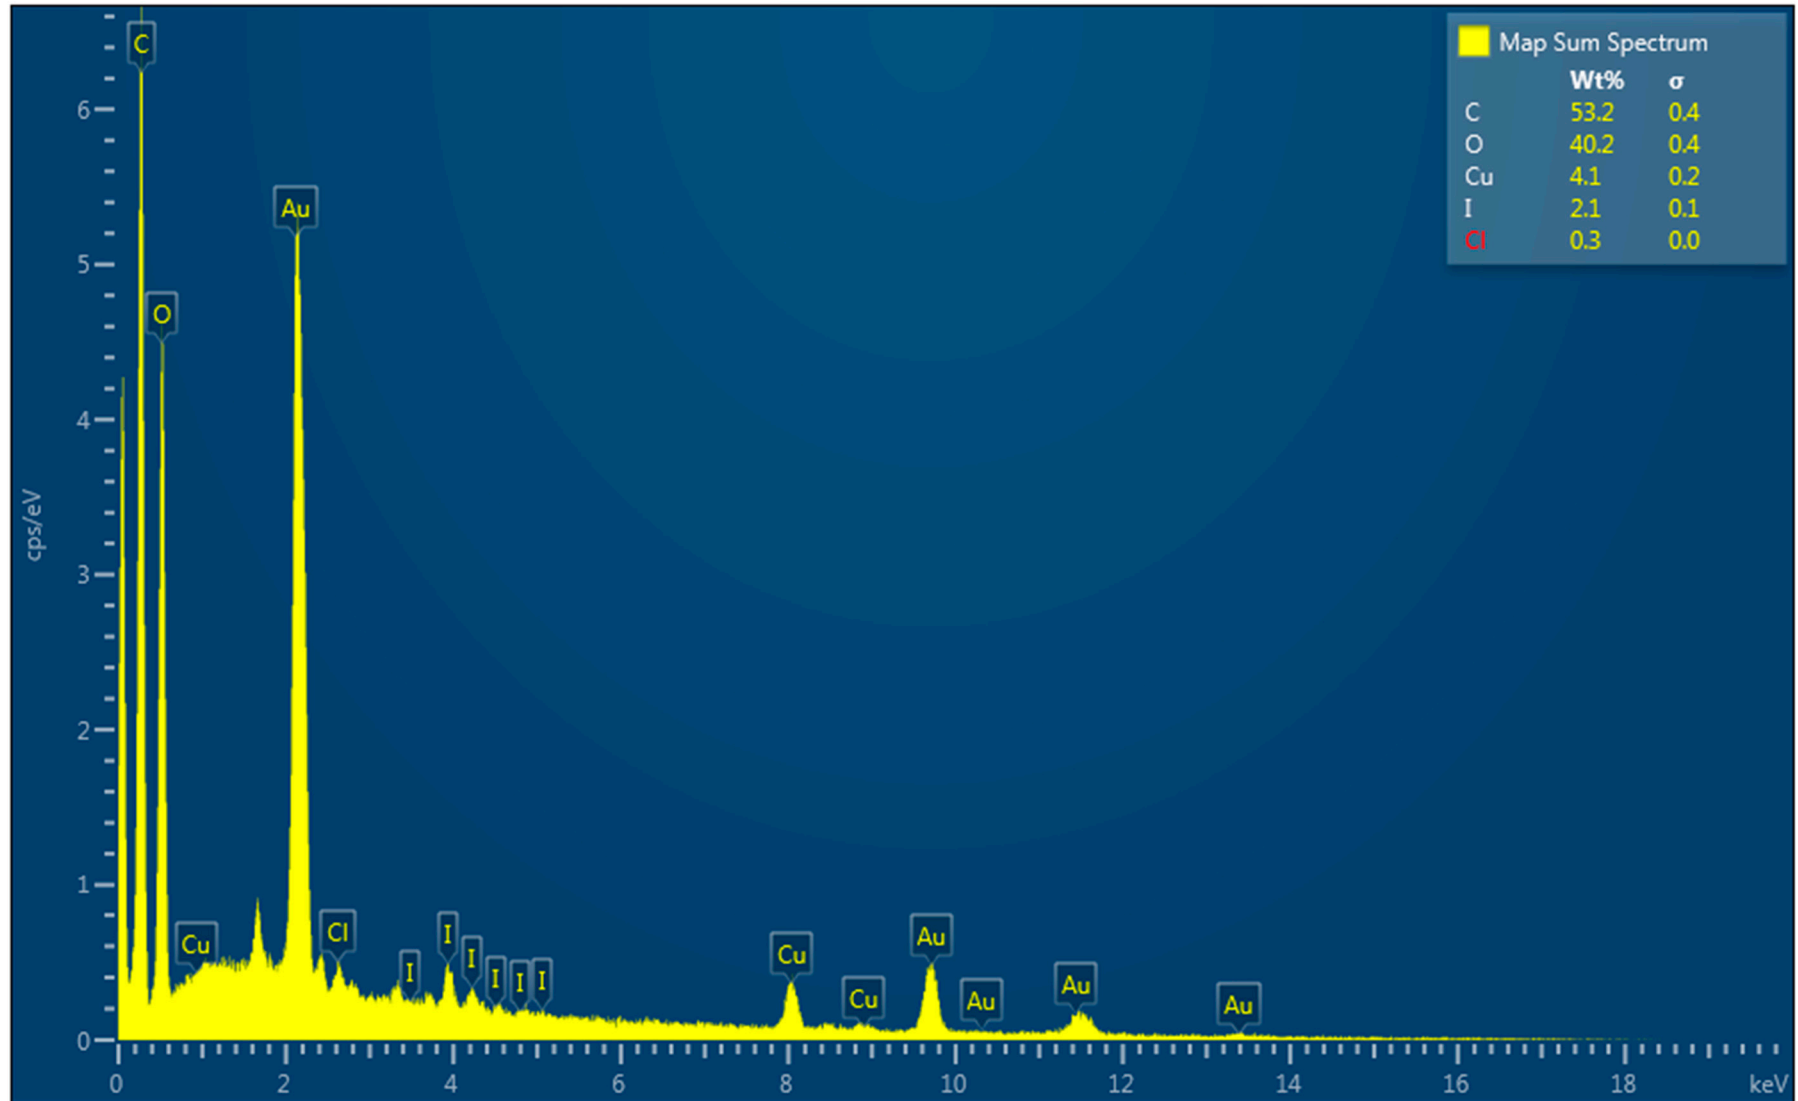

Supplement: s1 [file s1]

EDS Layered Image 6

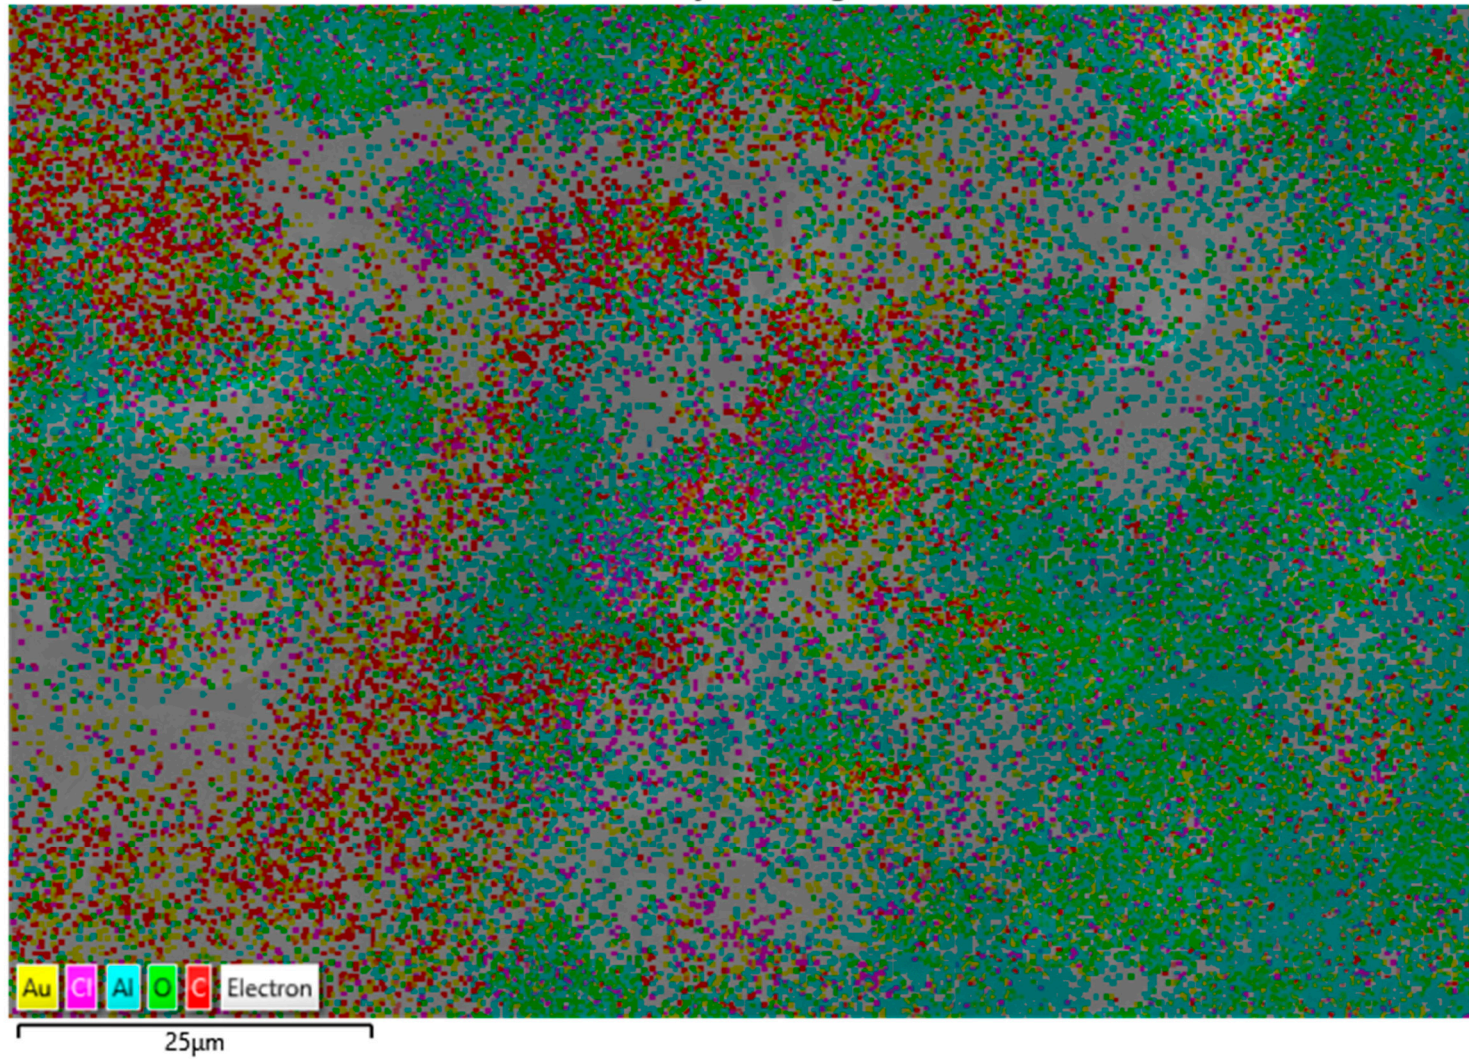

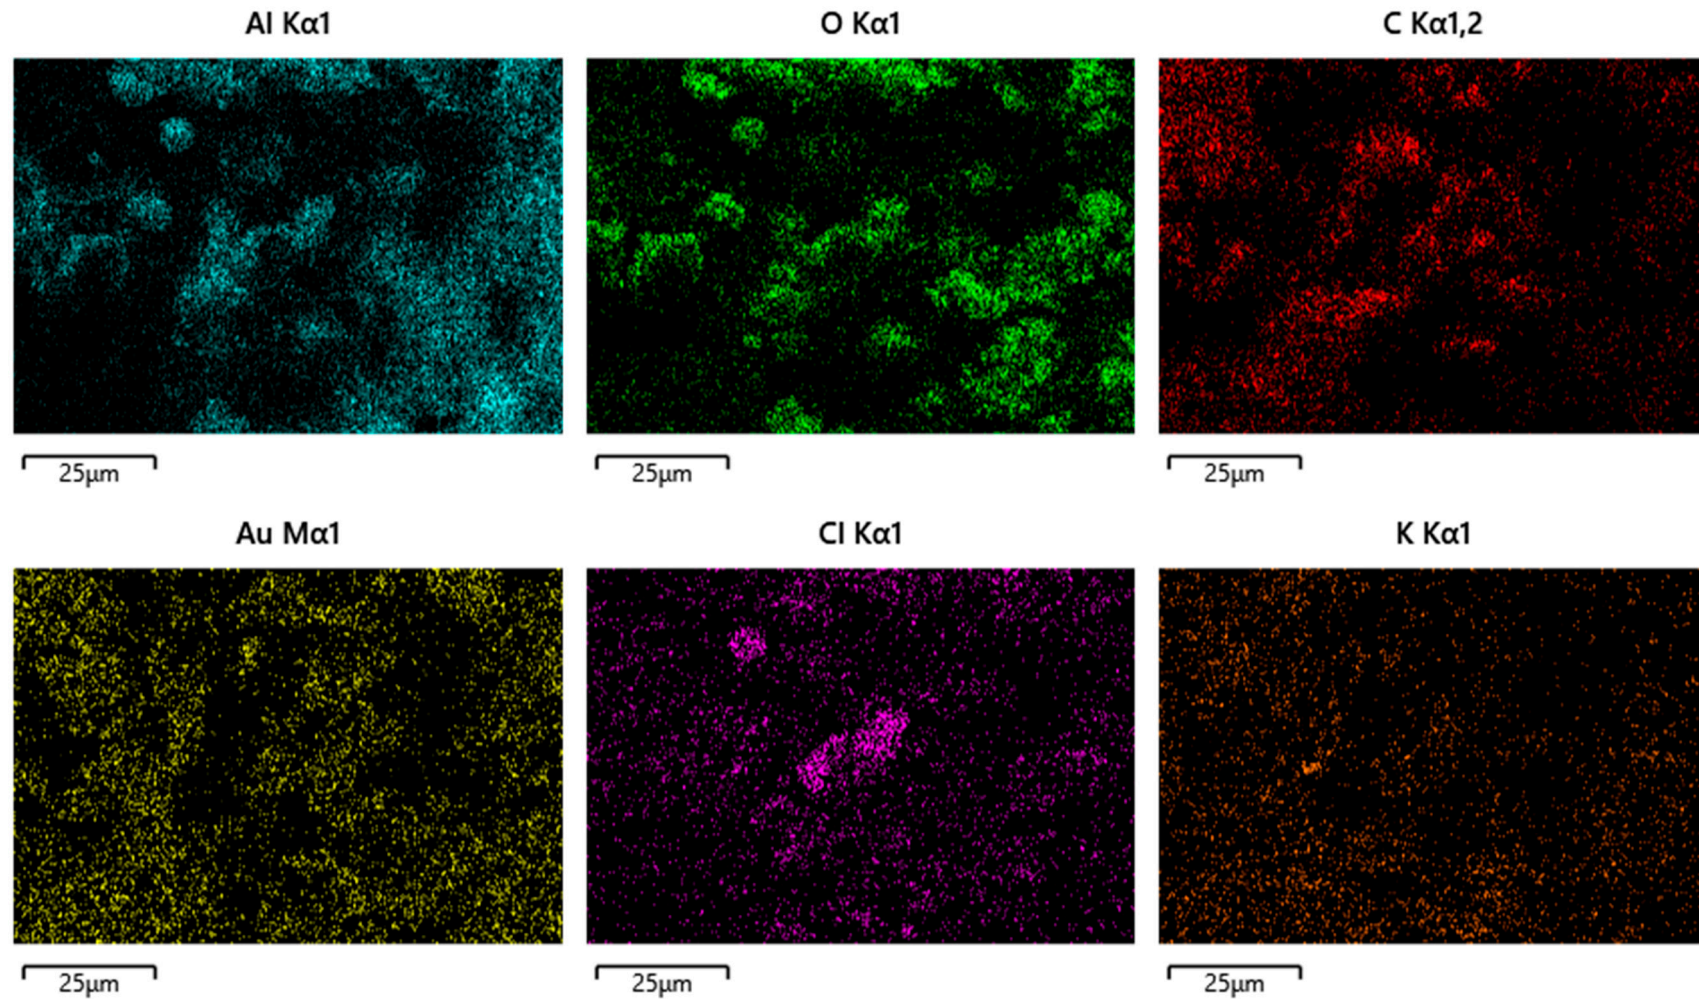



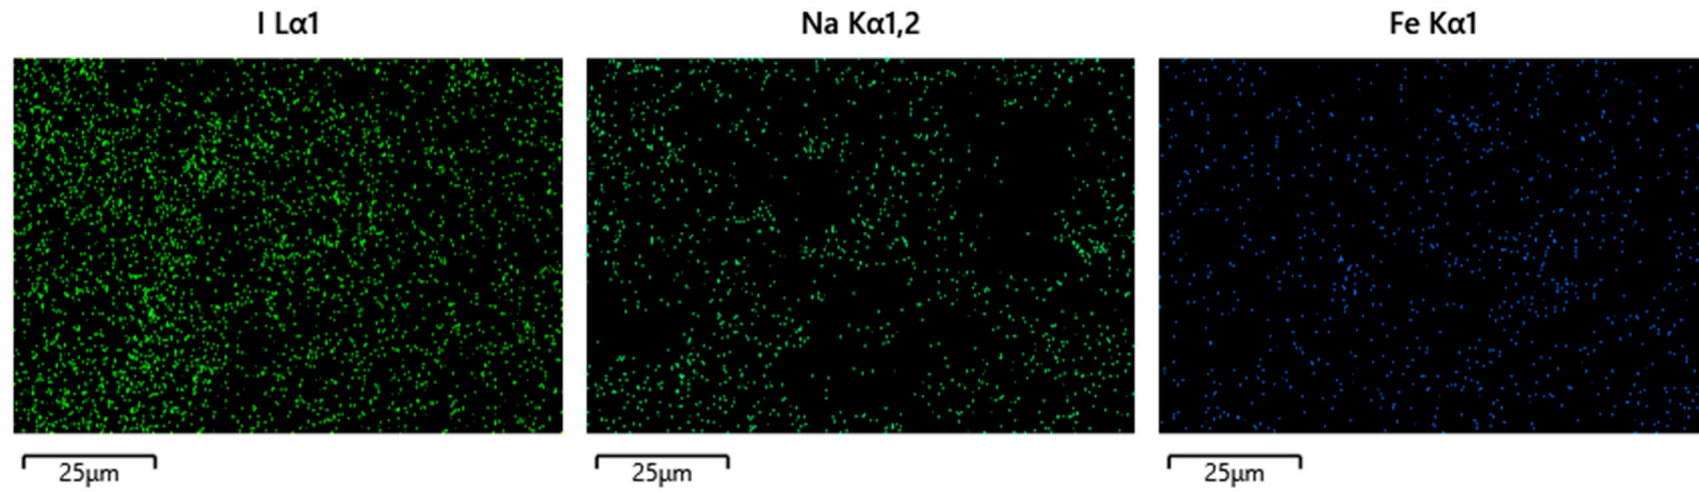

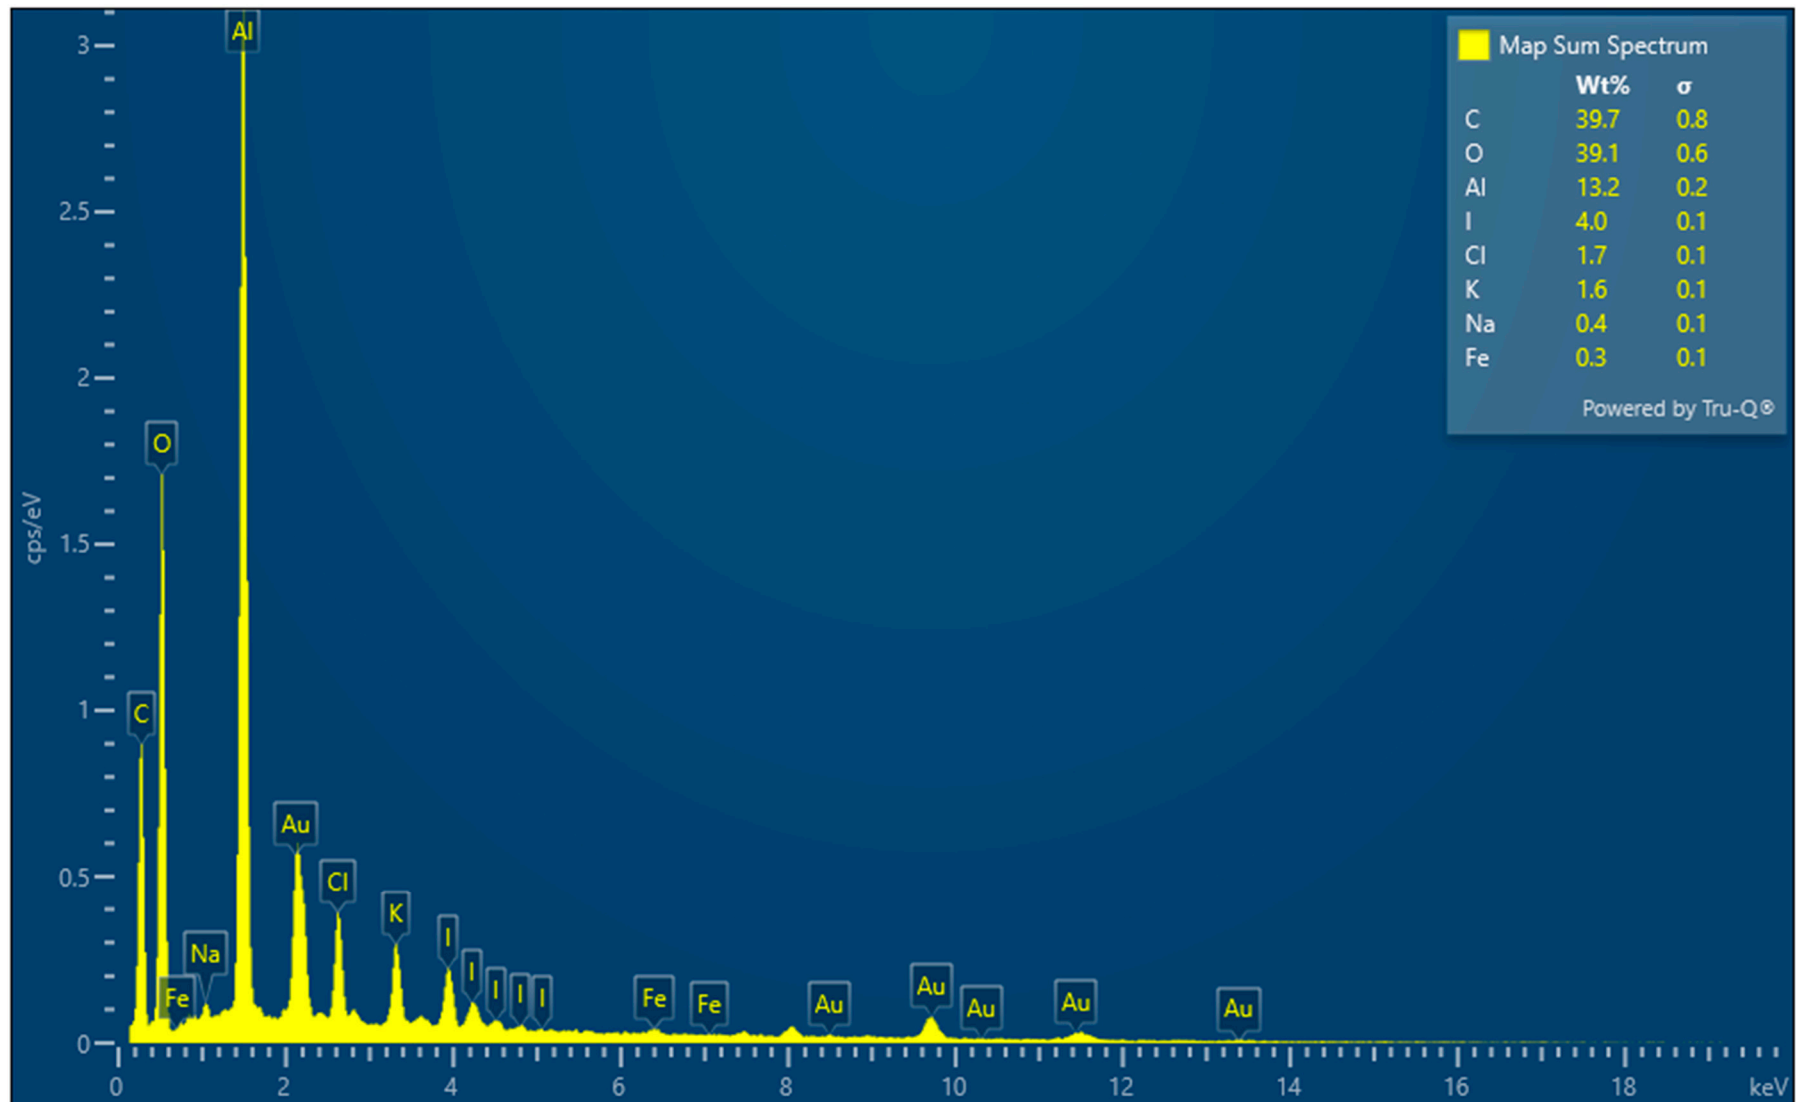

Supplement: s1 [file s1]

EDS Layered Image 2

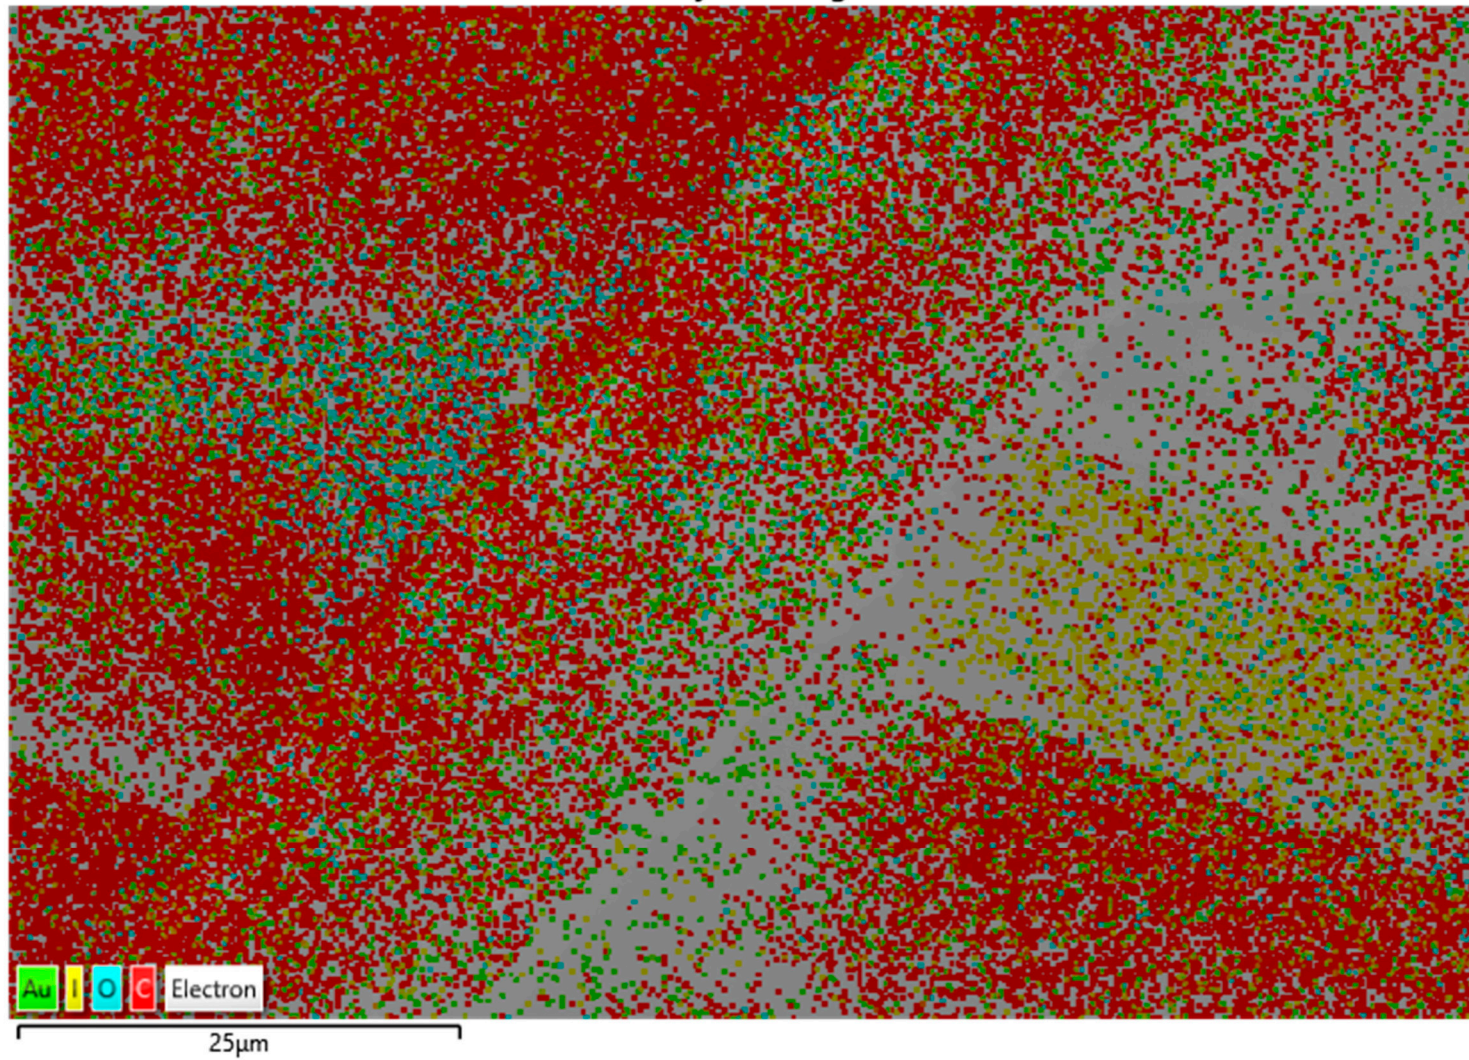

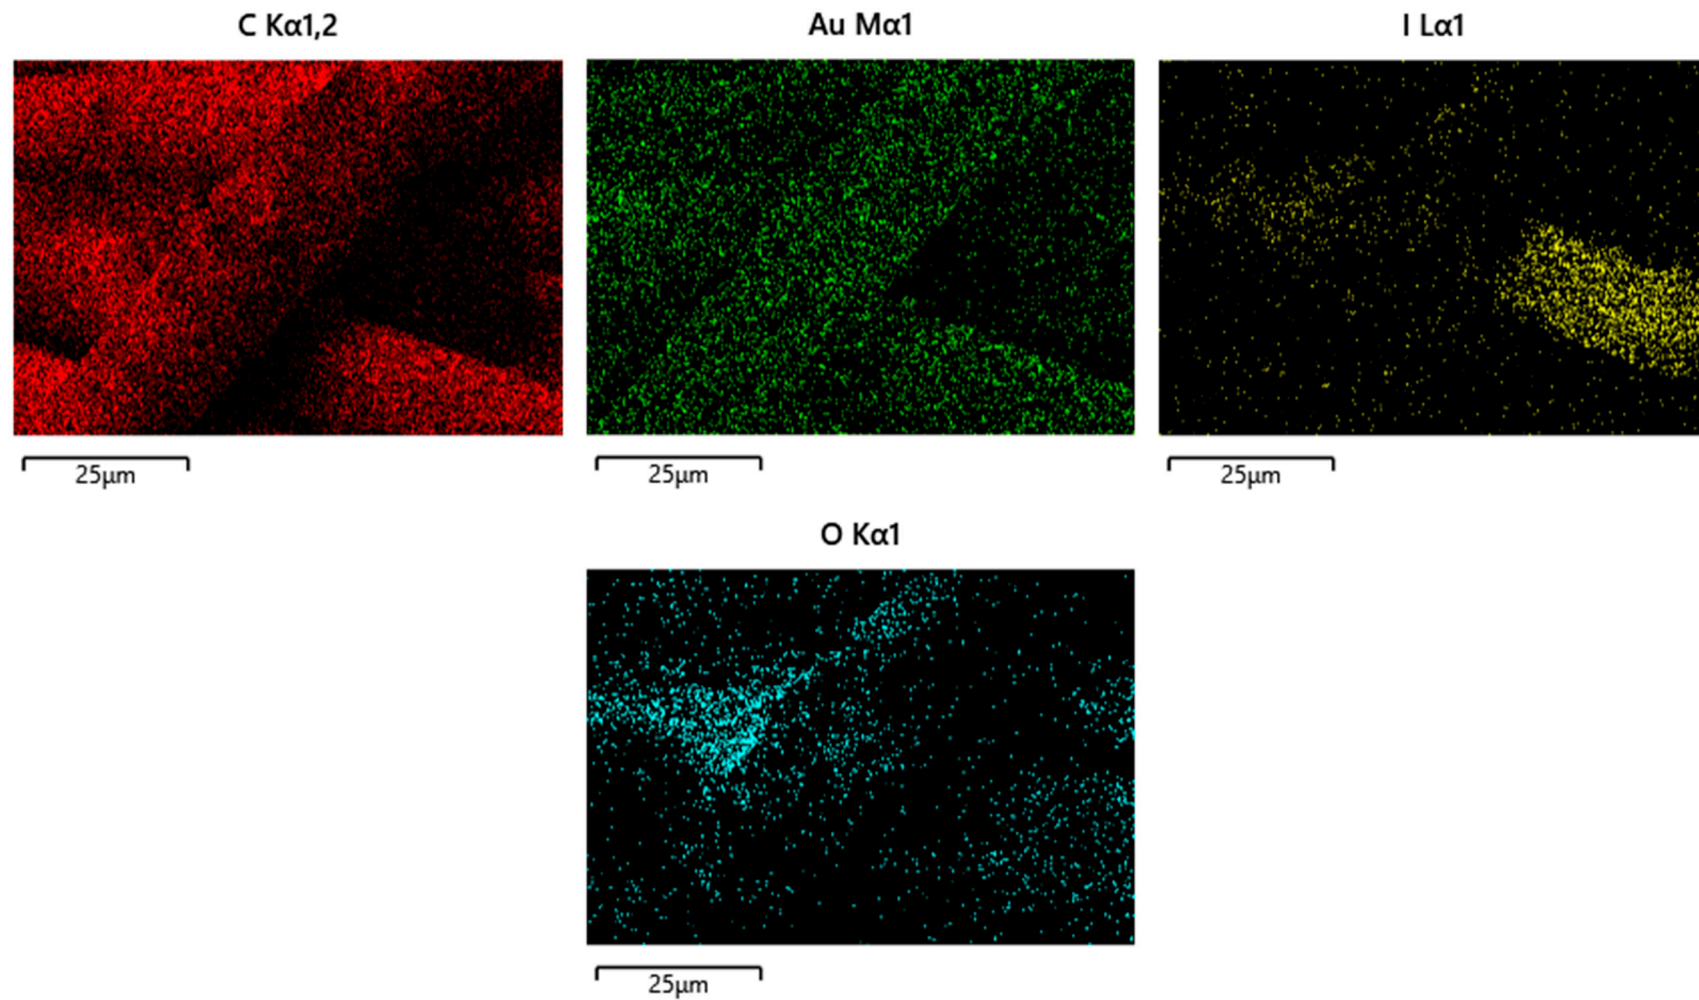

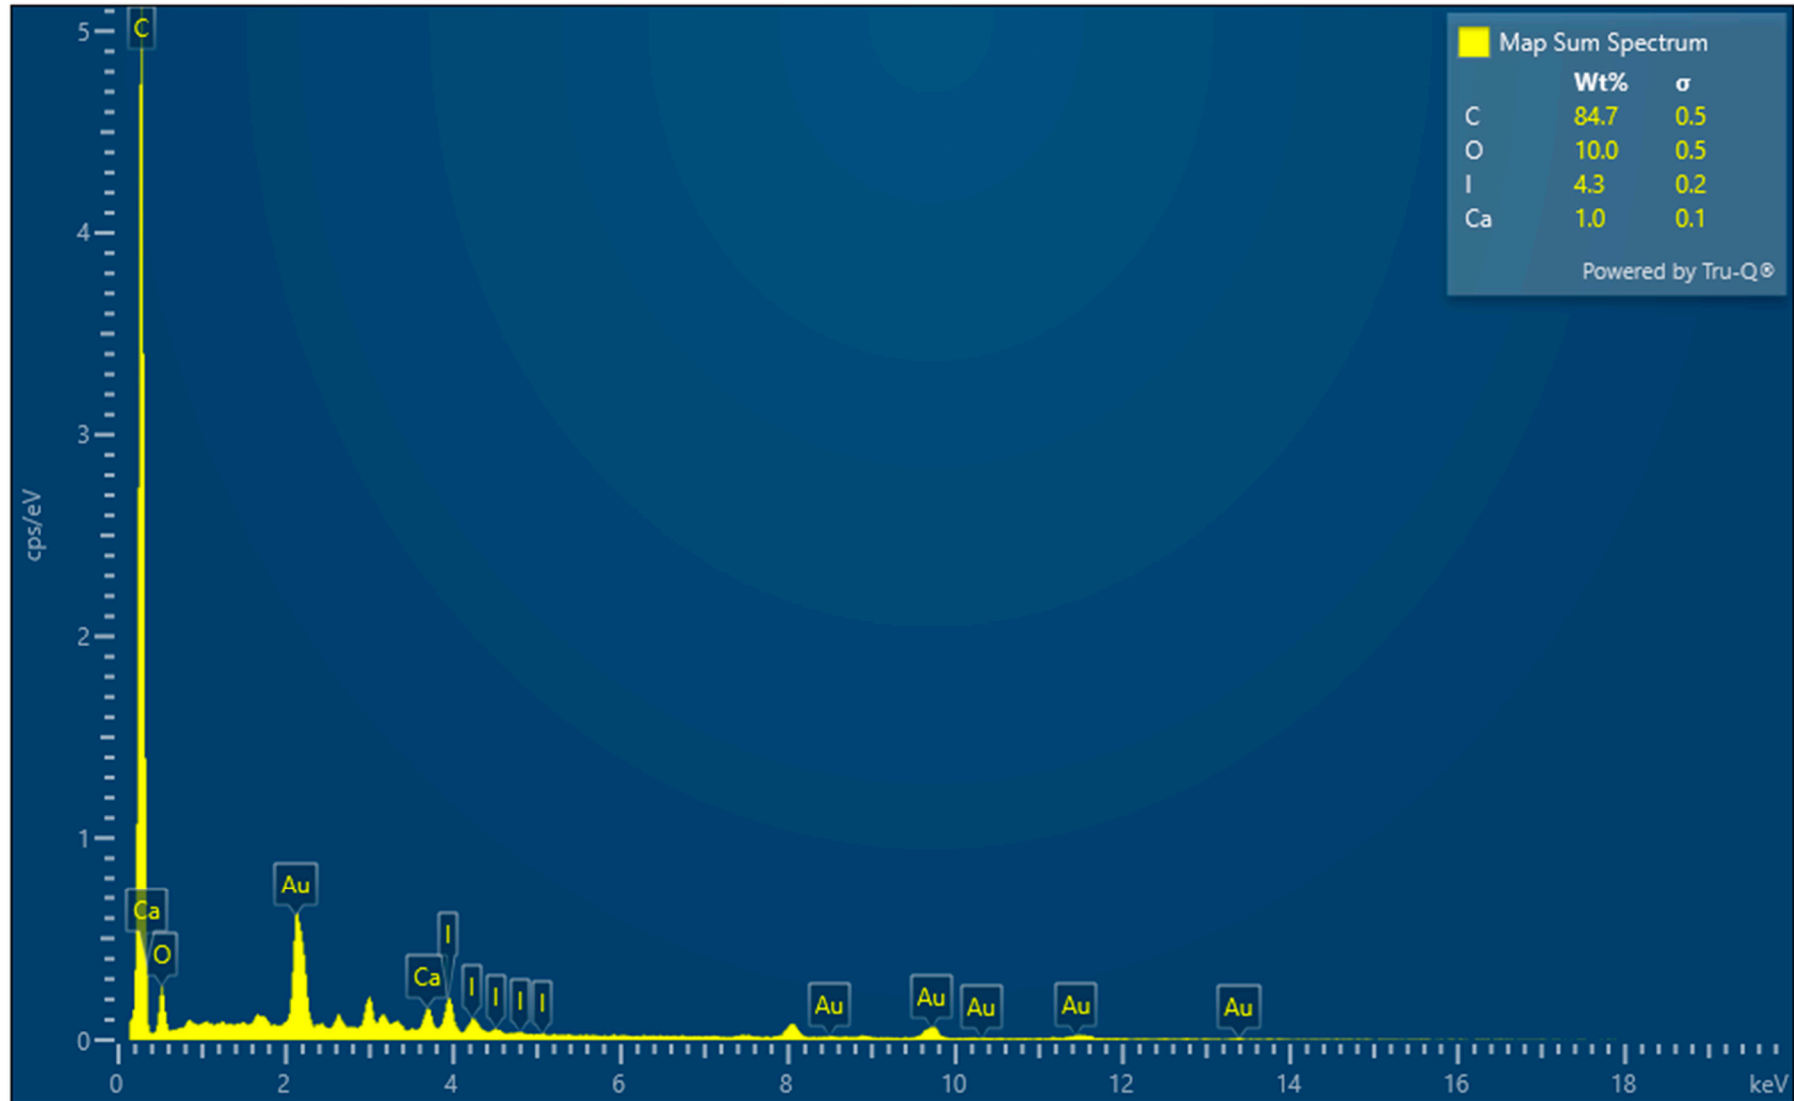

Supplement: s1 [file s1]
